# Supplementary material
Source: PubMed Central journal article supplement (PMC4971737)
Supplement: ijbsv12p0990s1.pdf [file ijbsv12p0990s1.pdf]

Supplementary table S1: Trabecular bone microarchitecture analyzed by  $\mu$ CT in distal femur of 2-month-old male WT and *Fgfr3*<sup>-/-</sup> mice injected with PTH1-34 (80ug/kg) or vehicle for 28 days.

| Groups                   | BV/TV (%)      | Tb.Th ( $\mu$ m) | Tb.N (1/mm)     | Tb.Sp ( $\mu$ m) | SMI           |
|--------------------------|----------------|------------------|-----------------|------------------|---------------|
| WT + Veh                 | 23.9 $\pm$ 8.5 | 85.5 $\pm$ 11.0  | 3.01 $\pm$ 1.02 | 209.5 $\pm$ 18.3 | 1.4 $\pm$ 0.2 |
| WT + PTH                 | 37.6 $\pm$ 9.4 | 88.0 $\pm$ 19.1  | 3.64 $\pm$ 0.75 | 170.7 $\pm$ 24.3 | 1.2 $\pm$ 0.4 |
| KO + Veh                 | 14.4 $\pm$ 6.1 | 74.4 $\pm$ 8.7   | 1.90 $\pm$ 0.68 | 234.4 $\pm$ 73.7 | 2.0 $\pm$ 0.3 |
| KO + PTH                 | 20.4 $\pm$ 7.1 | 80.7 $\pm$ 10.4  | 3.36 $\pm$ 0.98 | 224.9 $\pm$ 48.3 | 1.9 $\pm$ 0.3 |
| Two-way ANOVA (P values) |                |                  |                 |                  |               |
| Genotype                 | .005           | NS               | NS              | NS               | 0.001         |
| Treatment                | .028           | NS               | 0.019           | NS               | NS            |

BV/TV: bone volume/ tissue volume; Tb.Th: trabecular thickness; Tb.N: trabecular number; Tb.Sp: trabecular separation; SMI: structure model index. Data are expressed as mean  $\pm$  standard deviation for n=5 mice in each group. NS = not significant.

Supplementary table S2: Trabecular bone parameters analyzed by  $\mu$ CT in distal femur of 4-month-old male WT and *Fgfr3*<sup>-/-</sup> mice after PTH1-34 (80ug/kg) or vehicle treatment for 28 days.

| Groups                   | BV/TV (%)       | Tb.Th ( $\mu$ m) | Tb.N (1/mm)     | Tb.Sp ( $\mu$ m) | SMI             |
|--------------------------|-----------------|------------------|-----------------|------------------|-----------------|
| WT + Veh                 | 19.1 $\pm$ 3.4  | 68.9 $\pm$ 4.4   | 2.63 $\pm$ 0.42 | 236.0 $\pm$ 29.0 | 1.80 $\pm$ 0.29 |
| WT + PTH                 | 26.9 $\pm$ 8.5  | 83.5 $\pm$ 8.9   | 3.17 $\pm$ 0.71 | 192.2 $\pm$ 20.5 | 1.44 $\pm$ 0.31 |
| KO + Veh                 | 14.3 $\pm$ 5.1  | 86.8 $\pm$ 6.0   | 2.12 $\pm$ 1.1  | 330 $\pm$ 117.9  | 2.04 $\pm$ 0.41 |
| KO + PTH                 | 28.2 $\pm$ 11.7 | 124.3 $\pm$ 19.1 | 2.27 $\pm$ 0.85 | 194.4 $\pm$ 29.9 | 1.32 $\pm$ 0.50 |
| Two-way ANOVA (P values) |                 |                  |                 |                  |                 |
| Genotype                 | NS              | P < 0.001        | NS              | NS               | NS              |
| Treatment                | .045            | .001             | NS              | .015             | .016            |

BV/TV: bone volume/ tissue volume; Tb.Th: trabecular thickness; Tb.N: trabecular number; Tb.Sp: trabecular separation; SMI: structure model index. Data are expressed as mean  $\pm$  standard deviation for n=5 mice in each group. NS = not significant.
